# Supplementary material for: First-Principles Investigation of Size Effects on Cohesive Energies of Transition-Metal Nanoclusters
Source: MDPI journal article supplement (doi:10.3390/nano13162356), 2023-08-17
Supplement: s1 [file s1]

## Supplementary Information

### First-Principles Investigation of Size Effects on Cohesive Energies of Transition-Metal Nanoclusters

Amogh Vig <sup>1,2</sup>, Ethan Doan <sup>1</sup> and Kesong Yang <sup>1,\*</sup>

<sup>1</sup>Department of Nano and Chemical Engineering, University of California San Diego, 9500

Gilman Drive, Mail Code 0448, La Jolla, CA92093-0448, United States

<sup>2</sup>Data Science Institute, Vanderbilt University, 2201 West End Ave, Nashville, TN 37325-0001,

United States

\*Email: kesong@ucsd.edu, Phone: +1-858-534-2514

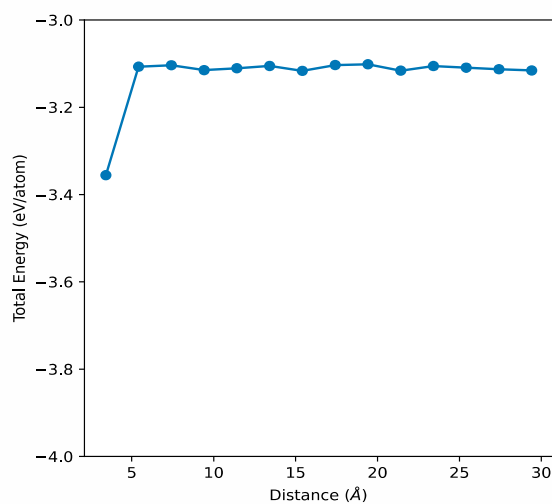

**Figure S1:** Calculated total energy as a function of the distance between two neighboring images of Ni<sub>4</sub> nanocluster.

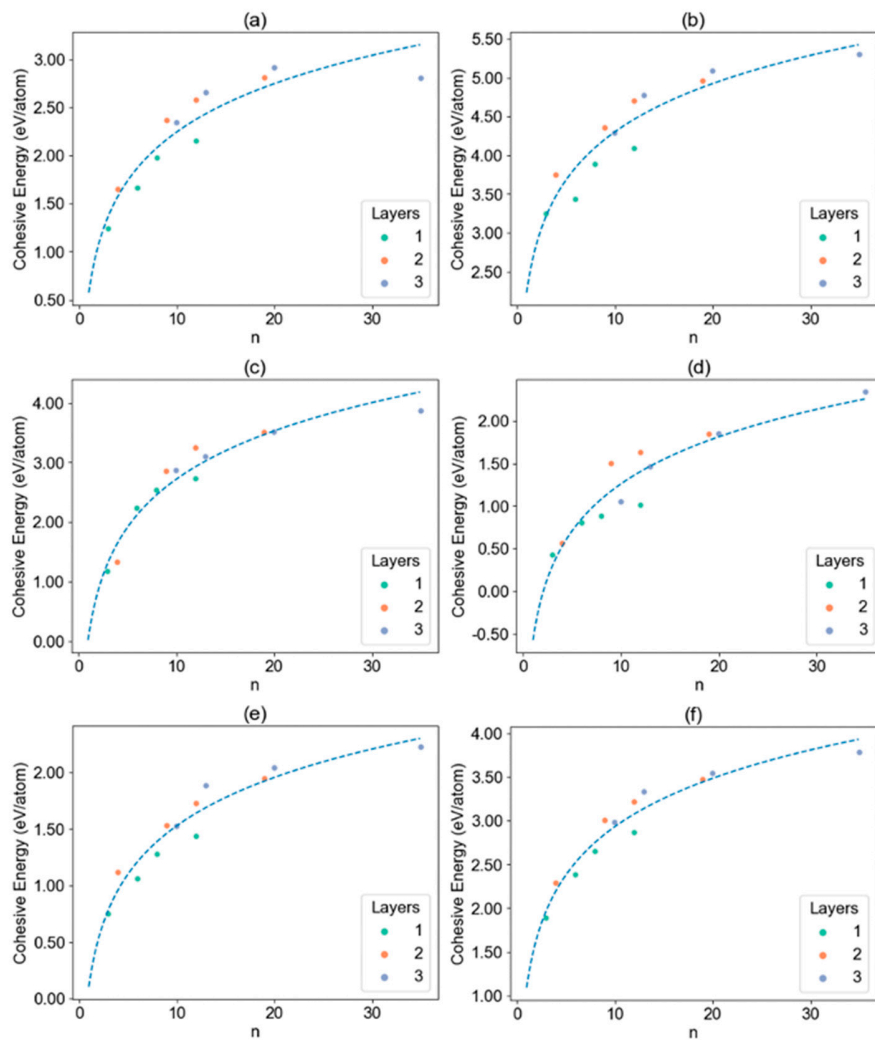

**Figure S2:** Calculated cohesive energy as a function of the nanocluster size ( $n$ ) for transition-metal nanoclusters ( $X_n$ ) in period 4 (a)  $X = \text{Sc}$ , (b)  $X = \text{Ti}$ , (c)  $X = \text{V}$ , (d)  $X = \text{Cr}$ , (e)  $X = \text{Mn}$ , and (f)  $X = \text{Fe}$ .

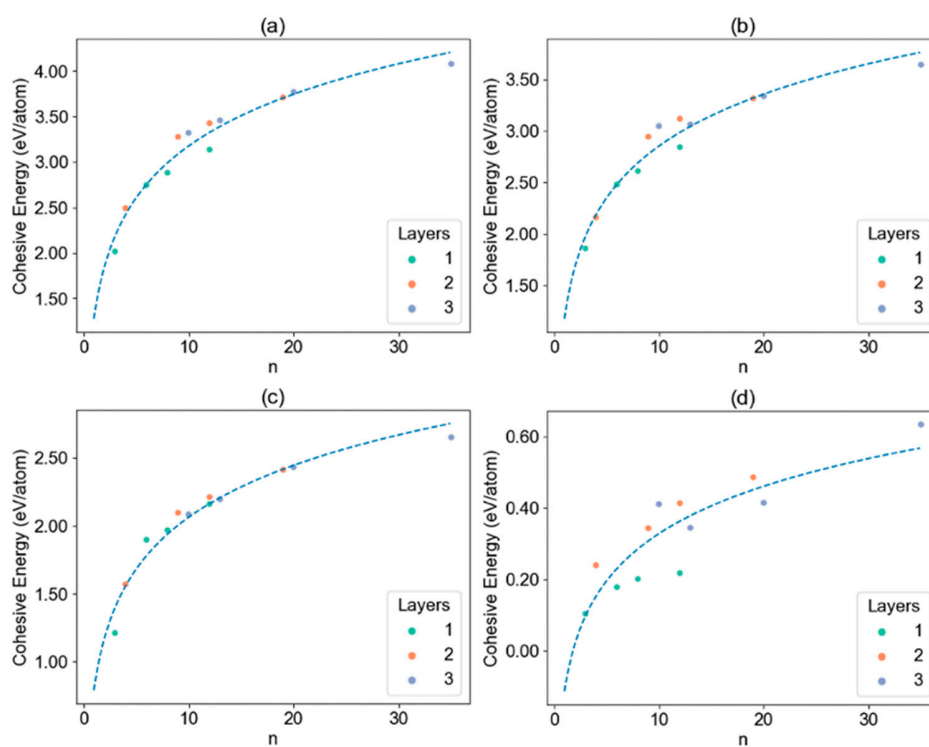

**Figure S3:** Calculated cohesive energy as a function of the nanocluster size ( $n$ ) for transition-metal nanoclusters ( $X_n$ ) in period 4 (a)  $X = \text{Co}$ , (b)  $X = \text{Ni}$ , (c)  $X = \text{Cu}$ , and (d)  $X = \text{Zn}$ .

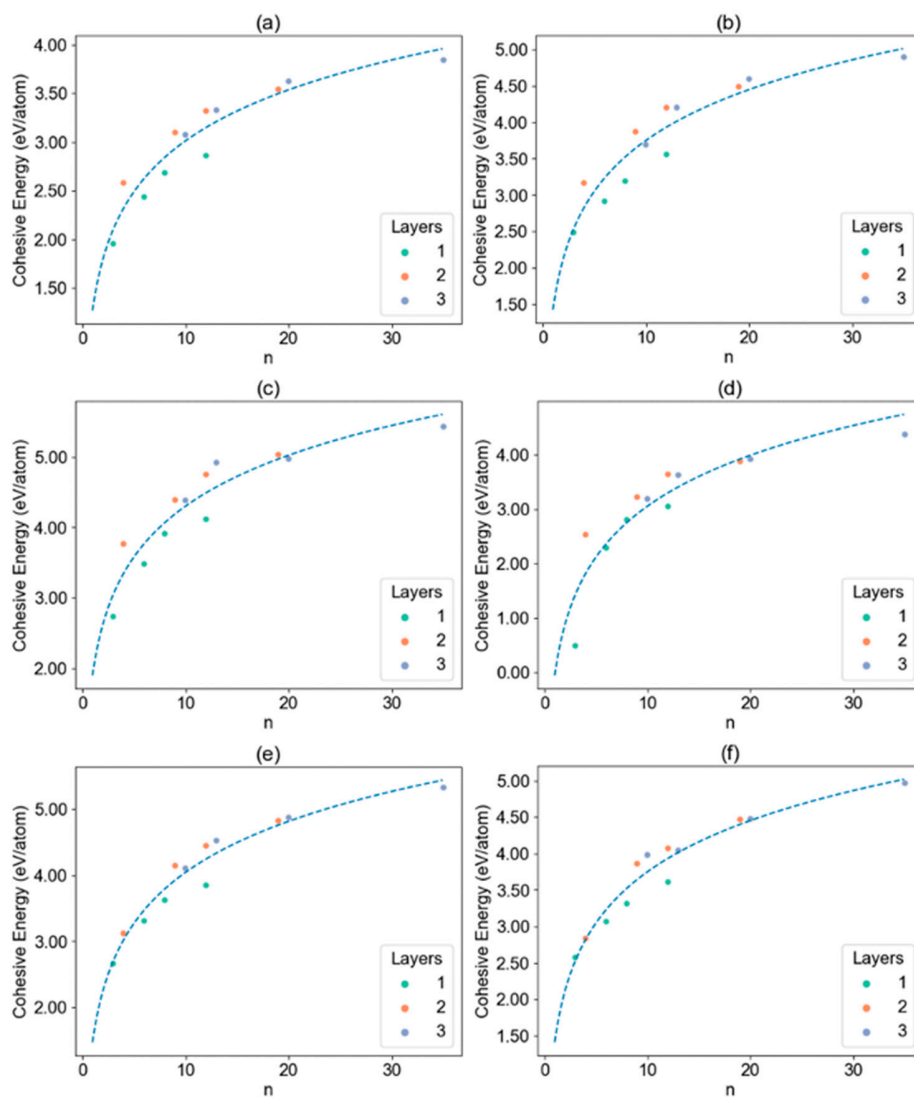

**Figure S4:** Calculated cohesive energy as a function of the nanocluster size ( $n$ ) for transition-metal nanoclusters ( $X_n$ ) in period 5 (a)  $X = Y$ , (b)  $X = Zr$ , (c)  $X = Nb$ , (d)  $X = Mo$ , (e)  $X = Tc$ , and (f)  $X = Ru$ .

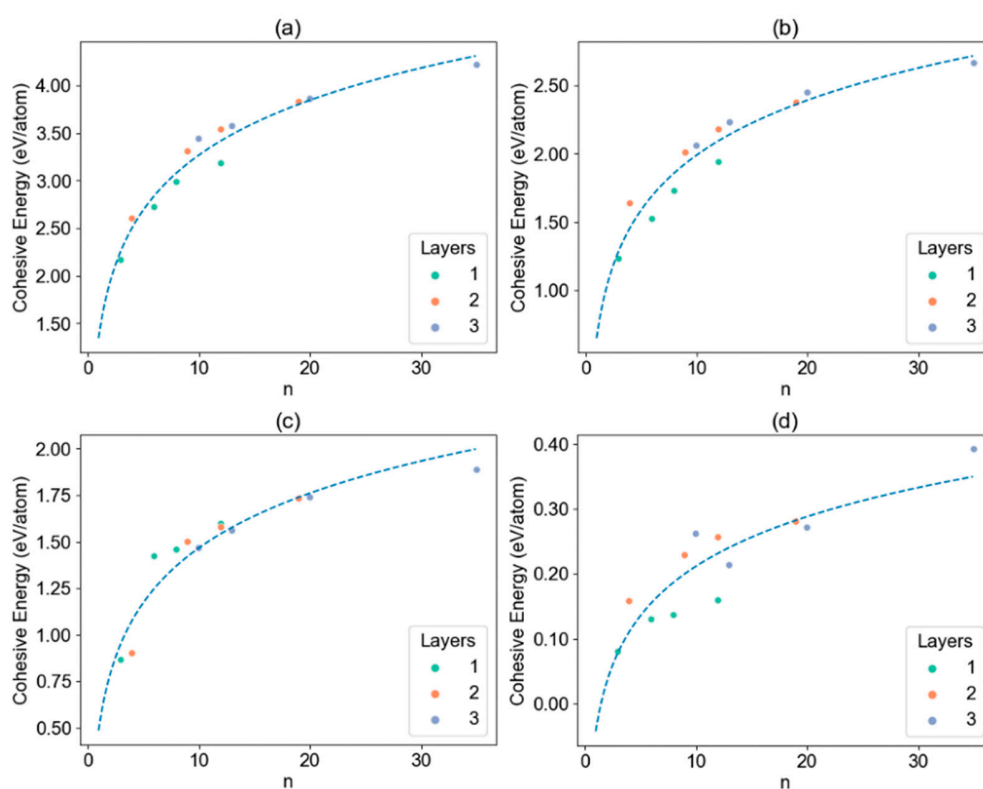

**Figure S5:** Calculated cohesive energy as a function of the nanocluster size ( $n$ ) for transition-metal nanoclusters ( $X_n$ ) in period 5 (a)  $X = \text{Rh}$ , (b)  $X = \text{Pd}$ , (c)  $X = \text{Ag}$ , and (d)  $X = \text{Cd}$ .

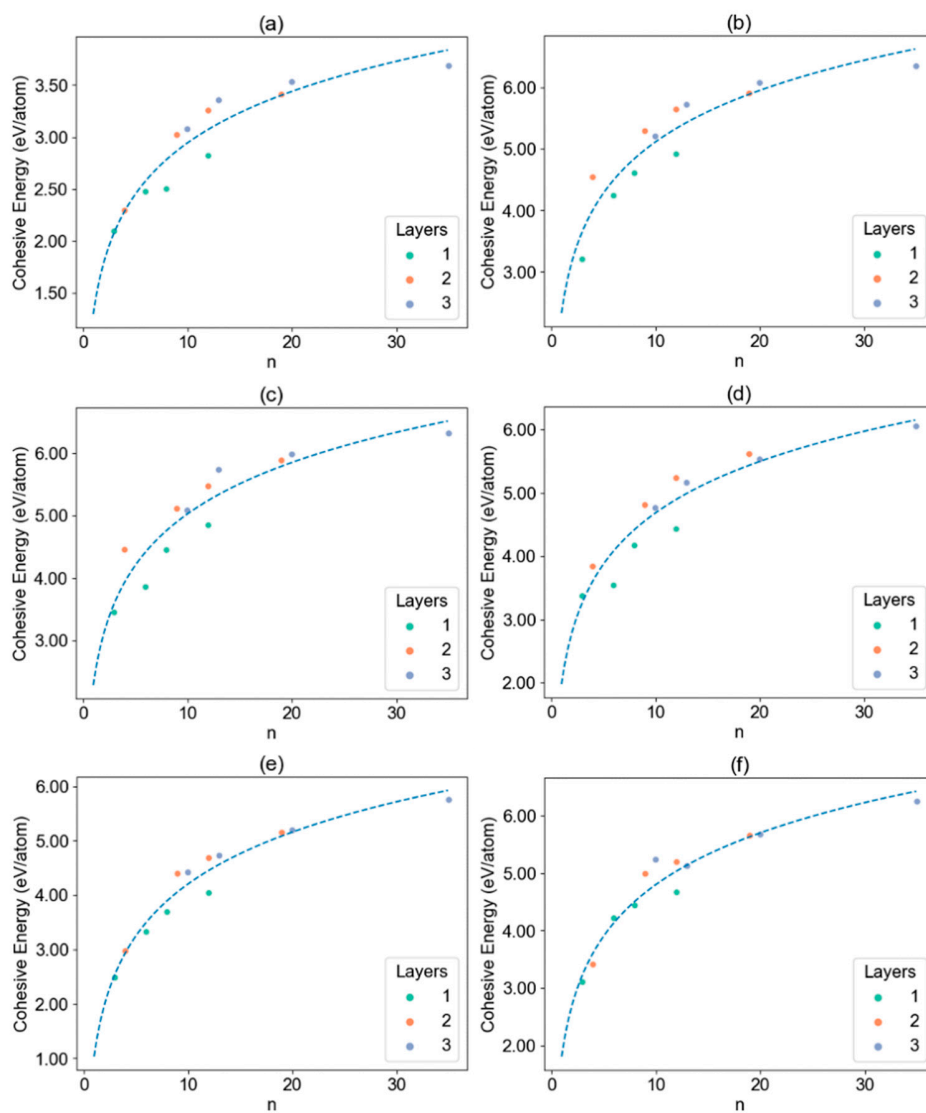

**Figure S6:** Calculated cohesive energy as a function of the nanocluster size ( $n$ ) for transition-metal nanoclusters ( $X_n$ ) in period 6 (a)  $X = \text{La}$ , (b)  $X = \text{Hf}$ , (c)  $X = \text{Ta}$ , (d)  $X = \text{W}$ , (e)  $X = \text{Re}$ , and (f)  $X = \text{Os}$ .

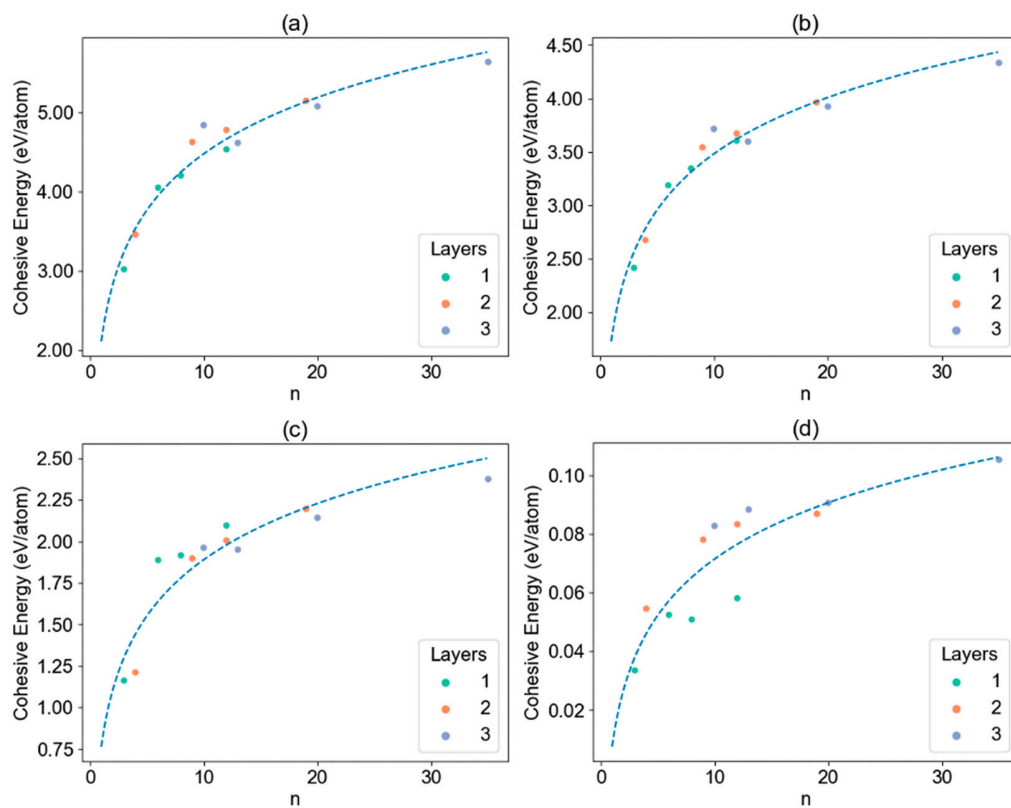

**Figure S7:** Calculated cohesive energy as a function of the nanocluster size ( $n$ ) for transition-metal nanoclusters ( $X_n$ ) in period 6 (a)  $X = \text{Ir}$ , (b)  $X = \text{Pt}$ , (c)  $X = \text{Au}$ , and (d)  $X = \text{Hg}$ .

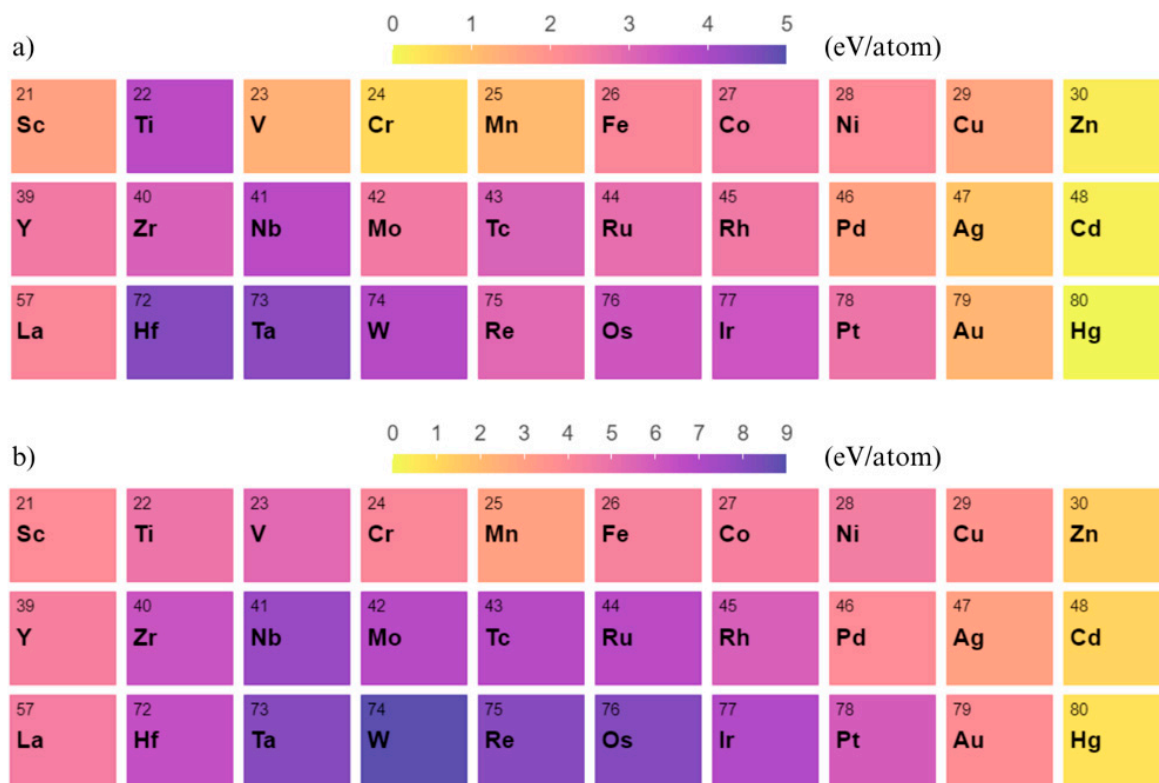

**Figure S8:** Heat map illustrating (a) the calculated cohesive energy (eV/atom) for transition-metal nanoclusters  $X_4$  and (b) the experimental values of the transition-metal bulk structures. Experimental data sourced from Kittel, Charles. *"Introduction to Solid State Physics"*, 8th edition. John Wiley & Sons, Inc., 2005.



**Table S1:** List of Parameters ' $a$ ' and ' $b$ ' in the Natural Logarithmic Function for Fitting Cohesive Energies of Nanoclusters.

| <b>Element</b> | <b><math>a</math></b> | <b><math>b</math></b> |
|----------------|-----------------------|-----------------------|
| Sc             | 0.72504841            | 2.20934348            |
| Ti             | 0.89810472            | 12.01789744           |
| V              | 1.16951657            | 1.02238005            |
| Cr             | 0.79397321            | 0.48902491            |
| Mn             | 0.61779602            | 1.1861684             |
| Fe             | 0.80001186            | 3.91109861            |
| Co             | 0.824159              | 4.70718674            |
| Ni             | 0.72964512            | 4.99065518            |
| Cu             | 0.55160499            | 4.20072647            |
| Zn             | 0.1913661             | 0.55464114            |
| Y              | 0.75614744            | 5.3667668             |
| Zr             | 1.00990119            | 4.09499696            |
| Nb             | 1.04150976            | 6.20878157            |
| Mo             | 1.35036784            | 0.96117769            |
| Tc             | 1.11531218            | 3.74701285            |
| Ru             | 1.01494177            | 4.02485467            |
| Rh             | 0.83450127            | 5.01848205            |
| Pd             | 0.58276816            | 3.03765054            |
| Ag             | 0.42541707            | 3.13586064            |
| Cd             | 0.11033387            | 0.67963352            |
| La             | 0.71446756            | 6.1480644             |
| Hf             | 1.21114911            | 6.83491705            |
| Ta             | 1.18925133            | 6.83612842            |
| W              | 1.17388636            | 5.396755              |
| Re             | 1.37633963            | 2.12208248            |
| Os             | 1.30260075            | 3.99292611            |
| Ir             | 1.02817762            | 7.76355096            |
| Pt             | 0.76148922            | 9.64927626            |
| Au             | 0.48851975            | 4.77290778            |

|    |            |            |
|----|------------|------------|
| Hg | 0.02775863 | 1.30970181 |
|----|------------|------------|

**Table S2:** Calculated cohesive energy ( $E_{coh}$ ) of the transition-metal nanoclusters ( $X_n$ ) in the group 3B (X=Sc, Y, and La).

| Nanocluster           | $E_{coh}$<br>(eV/atom) | Nanocluster          | $E_{coh}$<br>(eV/atom) | Nanocluster           | $E_{coh}$<br>(eV/atom) |
|-----------------------|------------------------|----------------------|------------------------|-----------------------|------------------------|
| Sc <sub>3</sub>       | 1.24                   | Y <sub>3</sub>       | 1.96                   | La <sub>3</sub>       | 2.09                   |
| Sc <sub>6</sub>       | 1.66                   | Y <sub>6</sub>       | 2.44                   | La <sub>6</sub>       | 2.47                   |
| Sc <sub>8</sub>       | 1.97                   | Y <sub>8</sub>       | 2.68                   | La <sub>8</sub>       | 2.50                   |
| Sc <sub>12</sub>      | 2.15                   | Y <sub>12</sub>      | 2.86                   | La <sub>12</sub>      | 2.82                   |
| Sc <sub>3-1</sub>     | 1.65                   | Y <sub>3-1</sub>     | 2.58                   | La <sub>3-1</sub>     | 2.29                   |
| Sc <sub>6-3</sub>     | 2.36                   | Y <sub>6-3</sub>     | 3.10                   | La <sub>6-3</sub>     | 3.02                   |
| Sc <sub>8-4</sub>     | 2.57                   | Y <sub>8-4</sub>     | 3.32                   | La <sub>8-4</sub>     | 3.25                   |
| Sc <sub>12-7</sub>    | 2.81                   | Y <sub>12-7</sub>    | 3.54                   | La <sub>12-7</sub>    | 3.41                   |
| Sc <sub>6-3-1</sub>   | 2.34                   | Y <sub>6-3-1</sub>   | 3.07                   | La <sub>6-3-1</sub>   | 3.07                   |
| Sc <sub>3-7-3</sub>   | 2.65                   | Y <sub>3-7-3</sub>   | 3.33                   | La <sub>3-7-3</sub>   | 3.35                   |
| Sc <sub>5-10-5</sub>  | 2.91                   | Y <sub>5-10-5</sub>  | 3.62                   | La <sub>5-10-5</sub>  | 3.53                   |
| Sc <sub>14-13-8</sub> | 2.80                   | Y <sub>14-13-8</sub> | 3.84                   | La <sub>14-13-8</sub> | 3.68                   |

**Table S3:** Calculated cohesive energy ( $E_{coh}$ ) of the transition-metal nanoclusters ( $X_n$ ) in the group 4B (X=Ti, Zr, and Hf).

| Nanocluster           | $E_{coh}$<br>(eV/atom) | Nanocluster           | $E_{coh}$<br>(eV/atom) | Nanocluster           | $E_{coh}$<br>(eV/atom) |
|-----------------------|------------------------|-----------------------|------------------------|-----------------------|------------------------|
| Ti <sub>3</sub>       | 3.25                   | Zr <sub>3</sub>       | 2.48                   | Hf <sub>3</sub>       | 3.20                   |
| Ti <sub>6</sub>       | 3.43                   | Zr <sub>6</sub>       | 2.91                   | Hf <sub>6</sub>       | 4.24                   |
| Ti <sub>8</sub>       | 3.88                   | Zr <sub>8</sub>       | 3.19                   | Hf <sub>8</sub>       | 4.61                   |
| Ti <sub>12</sub>      | 4.09                   | Zr <sub>12</sub>      | 3.56                   | Hf <sub>12</sub>      | 4.92                   |
| Ti <sub>3-1</sub>     | 3.75                   | Zr <sub>3-1</sub>     | 3.16                   | Hf <sub>3-1</sub>     | 4.54                   |
| Ti <sub>6-3</sub>     | 4.35                   | Zr <sub>6-3</sub>     | 3.87                   | Hf <sub>6-3</sub>     | 5.29                   |
| Ti <sub>8-4</sub>     | 4.70                   | Zr <sub>8-4</sub>     | 4.20                   | Hf <sub>8-4</sub>     | 5.64                   |
| Ti <sub>12-7</sub>    | 4.96                   | Zr <sub>12-7</sub>    | 4.49                   | Hf <sub>12-7</sub>    | 5.91                   |
| Ti <sub>6-3-1</sub>   | 4.29                   | Zr <sub>6-3-1</sub>   | 3.69                   | Hf <sub>6-3-1</sub>   | 5.21                   |
| Ti <sub>3-7-3</sub>   | 4.77                   | Zr <sub>3-7-3</sub>   | 4.20                   | Hf <sub>3-7-3</sub>   | 5.72                   |
| Ti <sub>5-10-5</sub>  | 5.08                   | Zr <sub>5-10-5</sub>  | 4.59                   | Hf <sub>5-10-5</sub>  | 6.08                   |
| Ti <sub>14-13-8</sub> | 5.30                   | Zr <sub>14-13-8</sub> | 4.89                   | Hf <sub>14-13-8</sub> | 6.35                   |

**Table S4:** Calculated cohesive energy ( $E_{coh}$ ) of the transition-metal nanoclusters ( $X_n$ ) in the group 5B ( $X=V$ , Nb, and Ta).

| Nanocluster          | $E_{coh}$<br>(eV/atom) | Nanocluster           | $E_{coh}$<br>(eV/atom) | Nanocluster           | $E_{coh}$<br>(eV/atom) |
|----------------------|------------------------|-----------------------|------------------------|-----------------------|------------------------|
| V <sub>3</sub>       | 1.17                   | Nb <sub>3</sub>       | 2.73                   | Ta <sub>3</sub>       | 3.45                   |
| V <sub>6</sub>       | 2.23                   | Nb <sub>6</sub>       | 3.48                   | Ta <sub>6</sub>       | 3.86                   |
| V <sub>8</sub>       | 2.53                   | Nb <sub>8</sub>       | 3.91                   | Ta <sub>8</sub>       | 4.45                   |
| V <sub>12</sub>      | 2.73                   | Nb <sub>12</sub>      | 4.11                   | Ta <sub>12</sub>      | 4.84                   |
| V <sub>3-1</sub>     | 1.33                   | Nb <sub>3-1</sub>     | 3.76                   | Ta <sub>3-1</sub>     | 4.45                   |
| V <sub>6-3</sub>     | 2.85                   | Nb <sub>6-3</sub>     | 4.39                   | Ta <sub>6-3</sub>     | 5.11                   |
| V <sub>8-4</sub>     | 3.24                   | Nb <sub>8-4</sub>     | 4.75                   | Ta <sub>8-4</sub>     | 5.47                   |
| V <sub>12-7</sub>    | 3.50                   | Nb <sub>12-7</sub>    | 5.03                   | Ta <sub>12-7</sub>    | 5.88                   |
| V <sub>6-3-1</sub>   | 2.87                   | Nb <sub>6-3-1</sub>   | 4.38                   | Ta <sub>6-3-1</sub>   | 5.08                   |
| V <sub>3-7-3</sub>   | 3.10                   | Nb <sub>3-7-3</sub>   | 4.92                   | Ta <sub>3-7-3</sub>   | 5.73                   |
| V <sub>5-10-5</sub>  | 3.51                   | Nb <sub>5-10-5</sub>  | 4.97                   | Ta <sub>5-10-5</sub>  | 5.98                   |
| V <sub>14-13-8</sub> | 3.86                   | Nb <sub>14-13-8</sub> | 5.43                   | Ta <sub>14-13-8</sub> | 6.31                   |

**Table S5:** Calculated cohesive energy ( $E_{coh}$ ) of the transition-metal nanoclusters ( $X_n$ ) in the group 6B (X=Cr, Mo, and W).

| Nanocluster           | $E_{coh}$<br>(eV/atom) | Nanocluster           | $E_{coh}$<br>(eV/atom) | Nanocluster          | $E_{coh}$<br>(eV/atom) |
|-----------------------|------------------------|-----------------------|------------------------|----------------------|------------------------|
| Cr <sub>3</sub>       | 0.43                   | Mo <sub>3</sub>       | 0.49                   | W <sub>3</sub>       | 3.37                   |
| Cr <sub>6</sub>       | 0.80                   | Mo <sub>6</sub>       | 2.29                   | W <sub>6</sub>       | 3.54                   |
| Cr <sub>8</sub>       | 0.88                   | Mo <sub>8</sub>       | 2.80                   | W <sub>8</sub>       | 4.17                   |
| Cr <sub>12</sub>      | 1.01                   | Mo <sub>12</sub>      | 3.05                   | W <sub>12</sub>      | 4.43                   |
| Cr <sub>3-1</sub>     | 0.56                   | Mo <sub>3-1</sub>     | 2.53                   | W <sub>3-1</sub>     | 3.84                   |
| Cr <sub>6-3</sub>     | 1.50                   | Mo <sub>6-3</sub>     | 3.22                   | W <sub>6-3</sub>     | 4.81                   |
| Cr <sub>8-4</sub>     | 1.63                   | Mo <sub>8-4</sub>     | 3.64                   | W <sub>8-4</sub>     | 5.23                   |
| Cr <sub>12-7</sub>    | 1.84                   | Mo <sub>12-7</sub>    | 3.88                   | W <sub>12-7</sub>    | 5.61                   |
| Cr <sub>6-3-1</sub>   | 1.05                   | Mo <sub>6-3-1</sub>   | 3.19                   | W <sub>6-3-1</sub>   | 4.76                   |
| Cr <sub>3-7-3</sub>   | 1.46                   | Mo <sub>3-7-3</sub>   | 3.63                   | W <sub>3-7-3</sub>   | 5.16                   |
| Cr <sub>5-10-5</sub>  | 1.84                   | Mo <sub>5-10-5</sub>  | 3.92                   | W <sub>5-10-5</sub>  | 5.53                   |
| Cr <sub>14-13-8</sub> | 2.33                   | Mo <sub>14-13-8</sub> | 4.37                   | W <sub>14-13-8</sub> | 6.05                   |

**Table S6:** Calculated cohesive energy ( $E_{coh}$ ) of the transition-metal nanoclusters ( $X_n$ ) in the group 7B (X=Mn, Tc, and Re).

| Nanocluster           | $E_{coh}$<br>(eV/atom) | Nanocluster           | $E_{coh}$<br>(eV/atom) | Nanocluster           | $E_{coh}$<br>(eV/atom) |
|-----------------------|------------------------|-----------------------|------------------------|-----------------------|------------------------|
| Mn <sub>3</sub>       | 0.75                   | Tc <sub>3</sub>       | 2.66                   | Re <sub>3</sub>       | 2.48                   |
| Mn <sub>6</sub>       | 1.06                   | Tc <sub>6</sub>       | 3.31                   | Re <sub>6</sub>       | 3.32                   |
| Mn <sub>8</sub>       | 1.28                   | Tc <sub>8</sub>       | 3.62                   | Re <sub>8</sub>       | 3.69                   |
| Mn <sub>12</sub>      | 1.43                   | Tc <sub>12</sub>      | 3.85                   | Re <sub>12</sub>      | 4.04                   |
| Mn <sub>3-1</sub>     | 1.12                   | Tc <sub>3-1</sub>     | 3.12                   | Re <sub>3-1</sub>     | 2.97                   |
| Mn <sub>6-3</sub>     | 1.53                   | Tc <sub>6-3</sub>     | 4.14                   | Re <sub>6-3</sub>     | 4.39                   |
| Mn <sub>8-4</sub>     | 1.72                   | Tc <sub>8-4</sub>     | 4.44                   | Re <sub>8-4</sub>     | 4.68                   |
| Mn <sub>12-7</sub>    | 1.94                   | Tc <sub>12-7</sub>    | 4.82                   | Re <sub>12-7</sub>    | 5.15                   |
| Mn <sub>6-3-1</sub>   | 1.52                   | Tc <sub>6-3-1</sub>   | 4.10                   | Re <sub>6-3-1</sub>   | 4.42                   |
| Mn <sub>3-7-3</sub>   | 1.88                   | Tc <sub>3-7-3</sub>   | 4.52                   | Re <sub>3-7-3</sub>   | 4.72                   |
| Mn <sub>5-10-5</sub>  | 2.04                   | Tc <sub>5-10-5</sub>  | 4.87                   | Re <sub>5-10-5</sub>  | 5.19                   |
| Mn <sub>14-13-8</sub> | 2.22                   | Tc <sub>14-13-8</sub> | 5.32                   | Re <sub>14-13-8</sub> | 5.75                   |

**Table S7:** Calculated cohesive energy ( $E_{coh}$ ) of the transition-metal nanoclusters ( $X_n$ ) in the group 8B (x=Fe, Ru, Os).

| Nanocluster           | $E_{coh}$<br>(eV/atom) | Nanocluster           | $E_{coh}$<br>(eV/atom) | Nanocluster           | $E_{coh}$<br>(eV/atom) |
|-----------------------|------------------------|-----------------------|------------------------|-----------------------|------------------------|
| Fe <sub>3</sub>       | 1.89                   | Ru <sub>3</sub>       | 2.57                   | Os <sub>3</sub>       | 3.10                   |
| Fe <sub>6</sub>       | 2.38                   | Ru <sub>6</sub>       | 3.07                   | Os <sub>6</sub>       | 4.22                   |
| Fe <sub>8</sub>       | 2.65                   | Ru <sub>8</sub>       | 3.31                   | Os <sub>8</sub>       | 4.44                   |
| Fe <sub>12</sub>      | 2.87                   | Ru <sub>12</sub>      | 3.61                   | Os <sub>12</sub>      | 4.67                   |
| Fe <sub>3-1</sub>     | 2.29                   | Ru <sub>3-1</sub>     | 2.83                   | Os <sub>3-1</sub>     | 3.41                   |
| Fe <sub>6-3</sub>     | 3.00                   | Ru <sub>6-3</sub>     | 3.86                   | Os <sub>6-3</sub>     | 4.99                   |
| Fe <sub>8-4</sub>     | 3.22                   | Ru <sub>8-4</sub>     | 4.07                   | Os <sub>8-4</sub>     | 5.20                   |
| Fe <sub>12-7</sub>    | 3.47                   | Ru <sub>12-7</sub>    | 4.47                   | Os <sub>12-7</sub>    | 5.66                   |
| Fe <sub>6-3-1</sub>   | 2.98                   | Ru <sub>6-3-1</sub>   | 3.98                   | Os <sub>6-3-1</sub>   | 5.24                   |
| Fe <sub>3-7-3</sub>   | 3.33                   | Ru <sub>3-7-3</sub>   | 4.04                   | Os <sub>3-7-3</sub>   | 5.13                   |
| Fe <sub>5-10-5</sub>  | 3.54                   | Ru <sub>5-10-5</sub>  | 4.48                   | Os <sub>5-10-5</sub>  | 5.68                   |
| Fe <sub>14-13-8</sub> | 3.78                   | Ru <sub>14-13-8</sub> | 4.97                   | Os <sub>14-13-8</sub> | 6.25                   |

**Table S8:** Calculated cohesive energy ( $E_{coh}$ ) of the transition-metal nanoclusters ( $X_n$ ) in the group 8B (X=Co, Rh, and Ir).

| Nanocluster           | $E_{coh}$<br>(eV/atom) | Nanocluster           | $E_{coh}$<br>(eV/atom) | Nanocluster           | $E_{coh}$<br>(eV/atom) |
|-----------------------|------------------------|-----------------------|------------------------|-----------------------|------------------------|
| Co <sub>3</sub>       | 2.02                   | Rh <sub>3</sub>       | 2.17                   | Ir <sub>3</sub>       | 3.02                   |
| Co <sub>6</sub>       | 2.75                   | Rh <sub>6</sub>       | 2.72                   | Ir <sub>6</sub>       | 4.05                   |
| Co <sub>8</sub>       | 2.88                   | Rh <sub>8</sub>       | 2.99                   | Ir <sub>8</sub>       | 4.20                   |
| Co <sub>12</sub>      | 3.13                   | Rh <sub>12</sub>      | 3.18                   | Ir <sub>12</sub>      | 4.53                   |
| Co <sub>3-1</sub>     | 2.49                   | Rh <sub>3-1</sub>     | 2.60                   | Ir <sub>3-1</sub>     | 3.46                   |
| Co <sub>6-3</sub>     | 3.28                   | Rh <sub>6-3</sub>     | 3.31                   | Ir <sub>6-3</sub>     | 4.62                   |
| Co <sub>8-4</sub>     | 3.43                   | Rh <sub>8-4</sub>     | 3.54                   | Ir <sub>8-4</sub>     | 4.78                   |
| Co <sub>12-7</sub>    | 3.71                   | Rh <sub>12-7</sub>    | 3.83                   | Ir <sub>12-7</sub>    | 5.15                   |
| Co <sub>6-3-1</sub>   | 3.32                   | Rh <sub>6-3-1</sub>   | 3.44                   | Ir <sub>6-3-1</sub>   | 4.84                   |
| Co <sub>3-7-3</sub>   | 3.46                   | Rh <sub>3-7-3</sub>   | 3.57                   | Ir <sub>3-7-3</sub>   | 4.61                   |
| Co <sub>5-10-5</sub>  | 3.77                   | Rh <sub>5-10-5</sub>  | 3.86                   | Ir <sub>5-10-5</sub>  | 5.07                   |
| Co <sub>14-13-8</sub> | 4.08                   | Rh <sub>14-13-8</sub> | 4.22                   | Ir <sub>14-13-8</sub> | 5.64                   |



**Table S9:** Calculated cohesive energy ( $E_{coh}$ ) of the transition-metal nanoclusters ( $X_n$ ) in the group 8B (X = Ni, Pd, and Pt).

| Nanocluster           | $E_{coh}$<br>(eV/atom) | Nanocluster           | $E_{coh}$<br>(eV/atom) | Nanocluster           | $E_{coh}$<br>(eV/atom) |
|-----------------------|------------------------|-----------------------|------------------------|-----------------------|------------------------|
| Ni <sub>3</sub>       | 1.86                   | Pd <sub>3</sub>       | 1.23                   | Pt <sub>3</sub>       | 2.41                   |
| Ni <sub>6</sub>       | 2.48                   | Pd <sub>6</sub>       | 1.52                   | Pt <sub>6</sub>       | 3.19                   |
| Ni <sub>8</sub>       | 2.61                   | Pd <sub>8</sub>       | 1.73                   | Pt <sub>8</sub>       | 3.34                   |
| Ni <sub>12</sub>      | 2.84                   | Pd <sub>12</sub>      | 1.94                   | Pt <sub>12</sub>      | 3.60                   |
| Ni <sub>3-1</sub>     | 2.16                   | Pd <sub>3-1</sub>     | 1.64                   | Pt <sub>3-1</sub>     | 2.67                   |
| Ni <sub>6-3</sub>     | 2.94                   | Pd <sub>6-3</sub>     | 2.01                   | Pt <sub>6-3</sub>     | 3.54                   |
| Ni <sub>8-4</sub>     | 3.12                   | Pd <sub>8-4</sub>     | 2.18                   | Pt <sub>8-4</sub>     | 3.67                   |
| Ni <sub>12-7</sub>    | 3.32                   | Pd <sub>12-7</sub>    | 2.38                   | Pt <sub>12-7</sub>    | 3.96                   |
| Ni <sub>6-3-1</sub>   | 3.05                   | Pd <sub>6-3-1</sub>   | 2.06                   | Pt <sub>6-3-1</sub>   | 3.71                   |
| Ni <sub>3-7-3</sub>   | 3.06                   | Pd <sub>3-7-3</sub>   | 2.23                   | Pt <sub>3-7-3</sub>   | 3.59                   |
| Ni <sub>5-10-5</sub>  | 3.34                   | Pd <sub>5-10-5</sub>  | 2.45                   | Pt <sub>5-10-5</sub>  | 3.92                   |
| Ni <sub>14-13-8</sub> | 3.65                   | Pd <sub>14-13-8</sub> | 2.67                   | Pt <sub>14-13-8</sub> | 4.33                   |

**Table S10:** Calculated cohesive energy ( $E_{coh}$ ) of the transition-metal nanoclusters ( $X_n$ ) in the group 1B ( $X$ =Cu, Ag, and Au).

| Nanocluster           | $E_{coh}$<br>(eV/atom) | Nanocluster           | $E_{coh}$<br>(eV/atom) | Nanocluster           | $E_{coh}$<br>(eV/atom) |
|-----------------------|------------------------|-----------------------|------------------------|-----------------------|------------------------|
| Cu <sub>3</sub>       | 1.21                   | Ag <sub>3</sub>       | 0.87                   | Au <sub>3</sub>       | 1.16                   |
| Cu <sub>6</sub>       | 1.90                   | Ag <sub>6</sub>       | 1.42                   | Au <sub>6</sub>       | 1.89                   |
| Cu <sub>8</sub>       | 1.97                   | Ag <sub>8</sub>       | 1.46                   | Au <sub>8</sub>       | 1.91                   |
| Cu <sub>12</sub>      | 2.16                   | Ag <sub>12</sub>      | 1.60                   | Au <sub>12</sub>      | 2.09                   |
| Cu <sub>3-1</sub>     | 1.57                   | Ag <sub>3-1</sub>     | 0.90                   | Au <sub>3-1</sub>     | 1.21                   |
| Cu <sub>6-3</sub>     | 2.10                   | Ag <sub>6-3</sub>     | 1.50                   | Au <sub>6-3</sub>     | 1.90                   |
| Cu <sub>8-4</sub>     | 2.21                   | Ag <sub>8-4</sub>     | 1.58                   | Au <sub>8-4</sub>     | 2.00                   |
| Cu <sub>12-7</sub>    | 2.41                   | Ag <sub>12-7</sub>    | 1.73                   | Au <sub>12-7</sub>    | 2.19                   |
| Cu <sub>6-3-1</sub>   | 2.08                   | Ag <sub>6-3-1</sub>   | 1.47                   | Au <sub>6-3-1</sub>   | 1.96                   |
| Cu <sub>3-7-3</sub>   | 2.20                   | Ag <sub>3-7-3</sub>   | 1.56                   | Au <sub>3-7-3</sub>   | 1.95                   |
| Cu <sub>5-10-5</sub>  | 2.43                   | Ag <sub>5-10-5</sub>  | 1.74                   | Au <sub>5-10-5</sub>  | 2.14                   |
| Cu <sub>14-13-8</sub> | 2.65                   | Ag <sub>14-13-8</sub> | 1.89                   | Au <sub>14-13-8</sub> | 2.37                   |

**Table S11:** Calculated cohesive energy ( $E_{coh}$ ) of the transition-metal nanoclusters ( $X_n$ ) in the group 2B (X=Zn, Cd, and Hg).

| Nanocluster           | $E_{coh}$<br>(eV/atom) | Nanocluster           | $E_{coh}$<br>(eV/atom) | Nanocluster           | $E_{coh}$<br>(eV/atom) |
|-----------------------|------------------------|-----------------------|------------------------|-----------------------|------------------------|
| Zn <sub>3</sub>       | 0.10                   | Cd <sub>3</sub>       | 0.08                   | Hg <sub>3</sub>       | 0.03                   |
| Zn <sub>6</sub>       | 0.18                   | Cd <sub>6</sub>       | 0.13                   | Hg <sub>6</sub>       | 0.05                   |
| Zn <sub>8</sub>       | 0.20                   | Cd <sub>8</sub>       | 0.14                   | Hg <sub>8</sub>       | 0.05                   |
| Zn <sub>12</sub>      | 0.22                   | Cd <sub>12</sub>      | 0.16                   | Hg <sub>12</sub>      | 0.06                   |
| Zn <sub>3-1</sub>     | 0.24                   | Cd <sub>3-1</sub>     | 0.16                   | Hg <sub>3-1</sub>     | 0.05                   |
| Zn <sub>6-3</sub>     | 0.34                   | Cd <sub>6-3</sub>     | 0.23                   | Hg <sub>6-3</sub>     | 0.08                   |
| Zn <sub>8-4</sub>     | 0.41                   | Cd <sub>8-4</sub>     | 0.26                   | Hg <sub>8-4</sub>     | 0.08                   |
| Zn <sub>12-7</sub>    | 0.49                   | Cd <sub>12-7</sub>    | 0.28                   | Hg <sub>12-7</sub>    | 0.09                   |
| Zn <sub>6-3-1</sub>   | 0.41                   | Cd <sub>6-3-1</sub>   | 0.26                   | Hg <sub>6-3-1</sub>   | 0.08                   |
| Zn <sub>3-7-3</sub>   | 0.34                   | Cd <sub>3-7-3</sub>   | 0.21                   | Hg <sub>3-7-3</sub>   | 0.09                   |
| Zn <sub>5-10-5</sub>  | 0.41                   | Cd <sub>5-10-5</sub>  | 0.27                   | Hg <sub>5-10-5</sub>  | 0.09                   |
| Zn <sub>14-13-8</sub> | 0.63                   | Cd <sub>14-13-8</sub> | 0.39                   | Hg <sub>14-13-8</sub> | 0.11                   |
